# Supplementary material
Source: Springer Nature journal article supplement (https://www.springermedizin.de/resource/supplementary/12875_2012_841_MOESM3_ESM.pdf/9435628)
Supplement: MOESM3 [file 9435628]

65 Nurses  
included

30 Nurses  
allocated to  
intervention group

35 Nurses allocated  
to  
control group

### Baseline

1 Nurses had left  
the practice

Lost 11 nurses due  
to:  
5 Bad recordings  
5 Audio recordings  
1 Set with < 5  
recordings

Intervention group had  
**18 nurses (60.0%)** and  
**90 video recordings**

3 Nurses had left  
the practice

Lost 17 nurses due  
to:  
6 Non-responders  
3 Bad recordings  
2 Audio recordings  
6 Sets with < 5  
recordings

Control group had  
**15 nurses (42.9%)** and  
**75 video recordings**

### 14 Months

6 Nurses had left  
the practice

23 Nurses were asked  
to make video  
recordings

8 Nurses had been  
lost:  
7 Non-responders  
1 Set with <5  
recordings

Intervention group had  
**15 nurses (65.2%)** and  
**75 video recordings**

2 Nurses had left  
the practice

30 Nurses were asked  
to make video  
recordings

10 Nurses had been  
lost:  
4 Non-responders  
3 Bad recordings  
3 Sets with <5  
recordings

Control group had  
**20 nurses (66.7%)** and  
**100 video recordings**
